# Supplementary material for: Catalyst-free development of N-doped microporous carbons for selective CO2 separation
Source: Royal Society of Chemistry journal article supplement (doi:10.1039/d1nj00644d), 2021-01-01
Supplement: d1nj00644d1.pdf [file d1nj00644d1.pdf]

## Electronic Supplementary Information (ESI)

# Catalyst-free development of N-doped microporous carbons for selective CO<sub>2</sub> separation

Sachin T. Mane\* and D. G. Kanase

*Department of Chemistry, Bharati Vidyapeeth's Dr. Patangrao Kadam Mahavidyalaya, Sangli, Maharashtra 416416, India.*

\*Corresponding author. E-mail: stm2011.mane@gmail.com.

| Contents | Numbers |
|----------|---------|
| Figures  | 5       |
| Pages    | 6       |

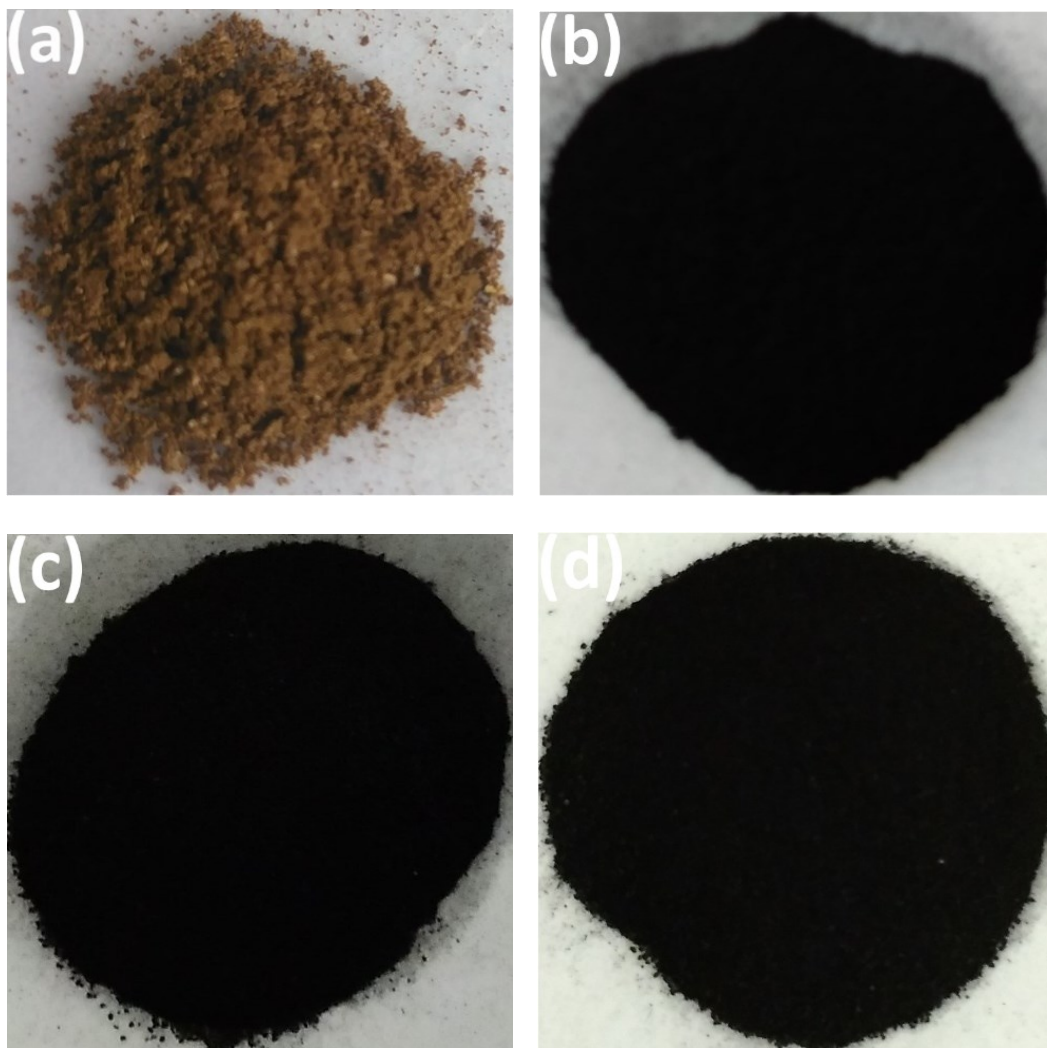

**Fig. S1.** The digital photos of **(a)** NMP-1, **(b)** NMC-700r, **(c)** NMC-700, and **(d)** NMC-800.

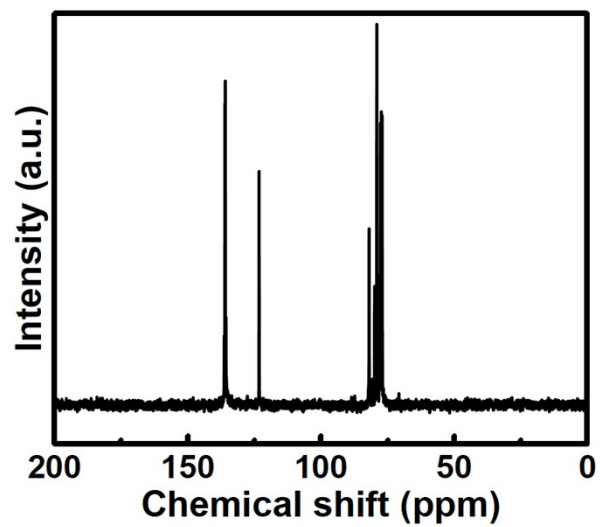

**Fig. S2.**  $^{13}\text{C}$  NMR spectrum ( $\text{CDCl}_3$ ) of the monomer TPB.

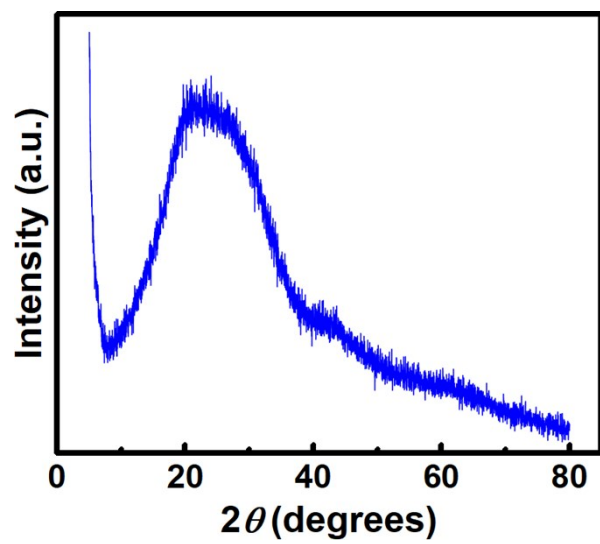

**Fig. S3.** X-ray diffraction pattern of NMP-1.

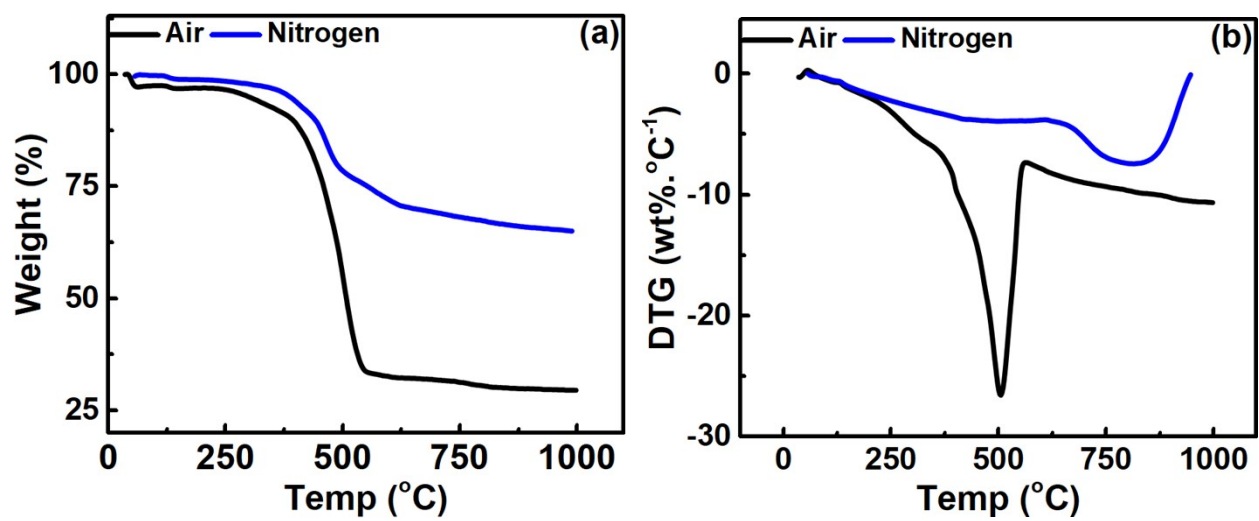

Fig. S4. (a) TG and (b) DTG of NMP-1 in air and nitrogen.

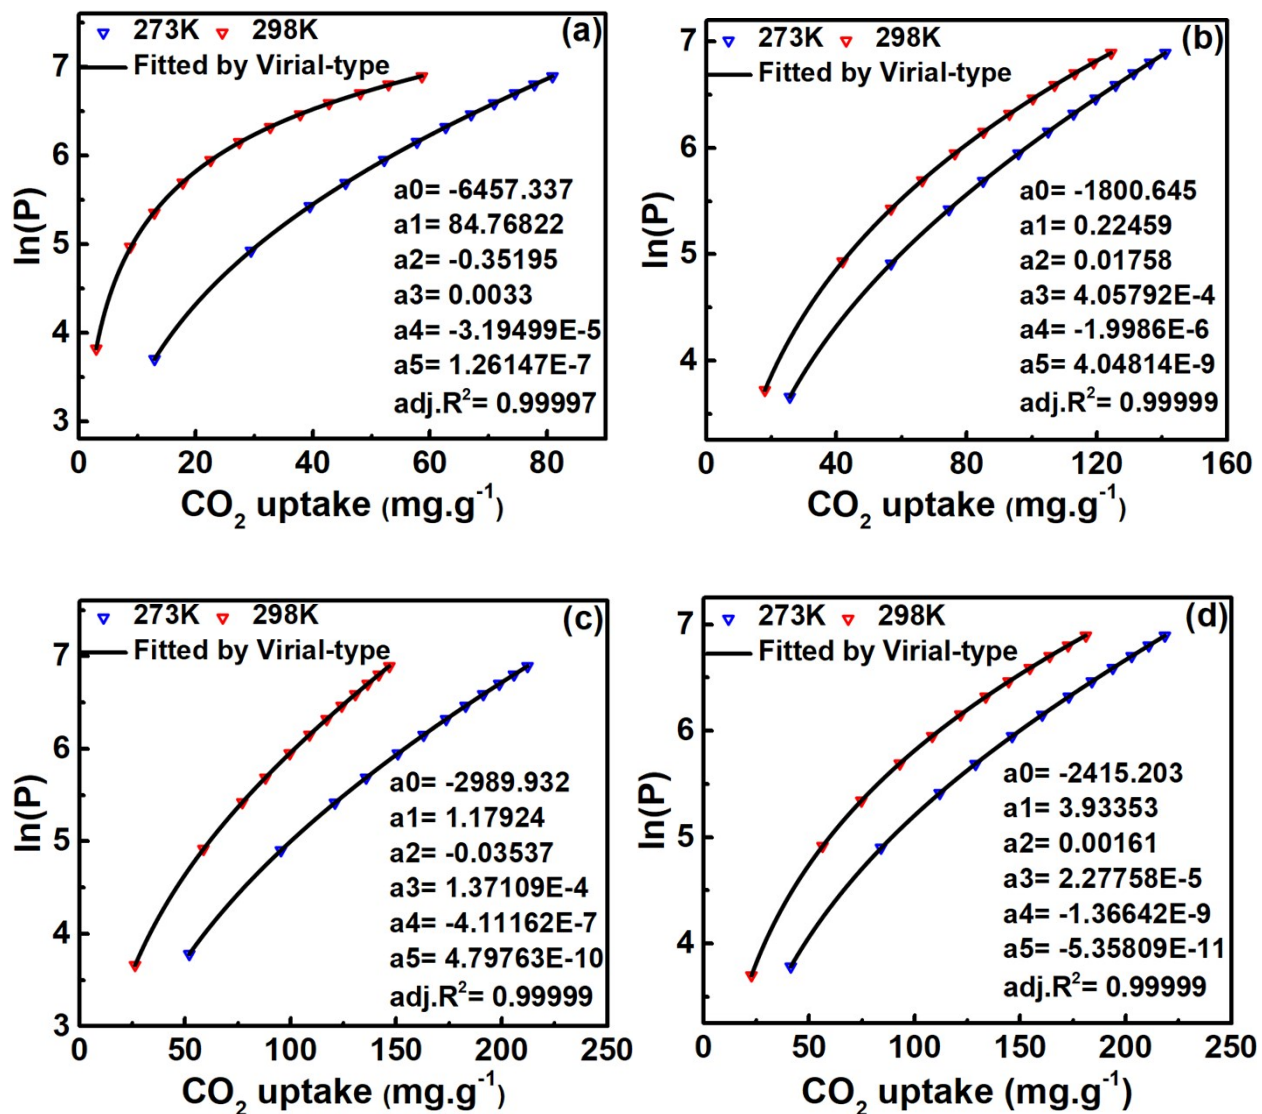

Fig. S5. Nonlinear curve fitting of (a) NMP-1, (b) NMC-700r, (c) NMC-700, and (d) NMC-800.
